# Supplementary material for: Mechanochemistry through Extrusion: Opportunities for Nanomaterials Design and Catalysis in the Continuous Mode
Source: MDPI journal article supplement (doi:10.3390/chemistry5030120), 2023-08-08
Supplement: s1 [file s1]

## SUPPORTING INFORMATION

# Mechanochemistry through extrusion: opportunities for materials design and catalysis

Oscar Trentin,<sup>1,\*</sup> Daniele Polidoro,<sup>1,\*</sup> Alvisè Perosa,<sup>1,\*</sup> Enrique Rodríguez-Castellón,<sup>2</sup> Daily Rodríguez-Padron,<sup>1,\*</sup> Maurizio Selva<sup>1,\*</sup>

Department of Molecular Science and Nanosystems, Ca' Foscari University of Venice, Via Torino 155, 30175 – Venezia Mestre, Italy

<sup>2</sup> Department of Inorganic Chemistry, Facultad de Ciencias, Universidad de Málaga, Campus de Teatinos s/n, 29071 Málaga, Spain

\* [daily.rodriguez@unive.it](mailto:daily.rodriguez@unive.it); [selva@unive.it](mailto:selva@unive.it)

**Abstract:** The potentialities of mechanochemistry through extrusion for nanomaterials design and organic synthesis have been herein investigated. In particular, palladium nanoparticles supported on *N*-doped carbons have been prepared via extrusion, employing chitin as carbon and nitrogen source, and ethylene glycol as a green reducing agent, in absence of solvents. The mechanochemical approach demonstrated to be effective for the reduction of Pd(II), the formation of Pd(0) nanoparticles with mean diameter within 6-10 nm, and the generation of a mesoporous network. The catalytic activity of the samples was investigated in the Suzuki-Miyaura cross-coupling reaction of iodobenzene and phenylboronic acid, also via extrusion, achieving promising results with conversion values of 81% and selectivity higher than 99%, representing a biphenyl productivity of 41 mmol g<sup>-1</sup> h<sup>-1</sup>.

**Keywords:** Mechanochemistry, Extrusion, Catalytic nanomaterials, Suzuki-Miyaura cross-coupling reaction

---

### List of content

- XRD data for Chitin
- Characterization of the coupling products of the Suzuki-Miyaura reaction
  - a. Biphenyl
  - b. 3-Methyl-1,1'-biphenyl

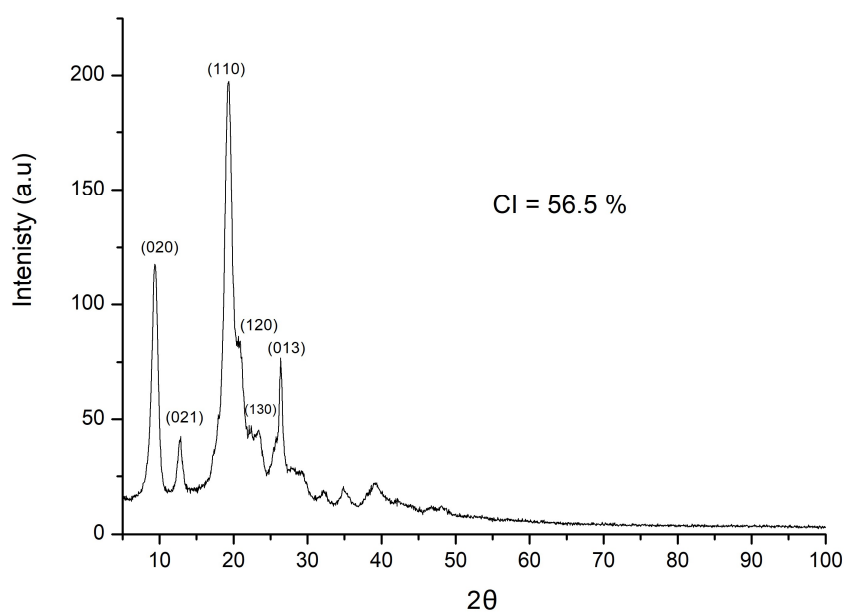

**Figure S1.** XRD diffractogram of a commercial sample of chitin. CI: crystallinity index

### Characterization data

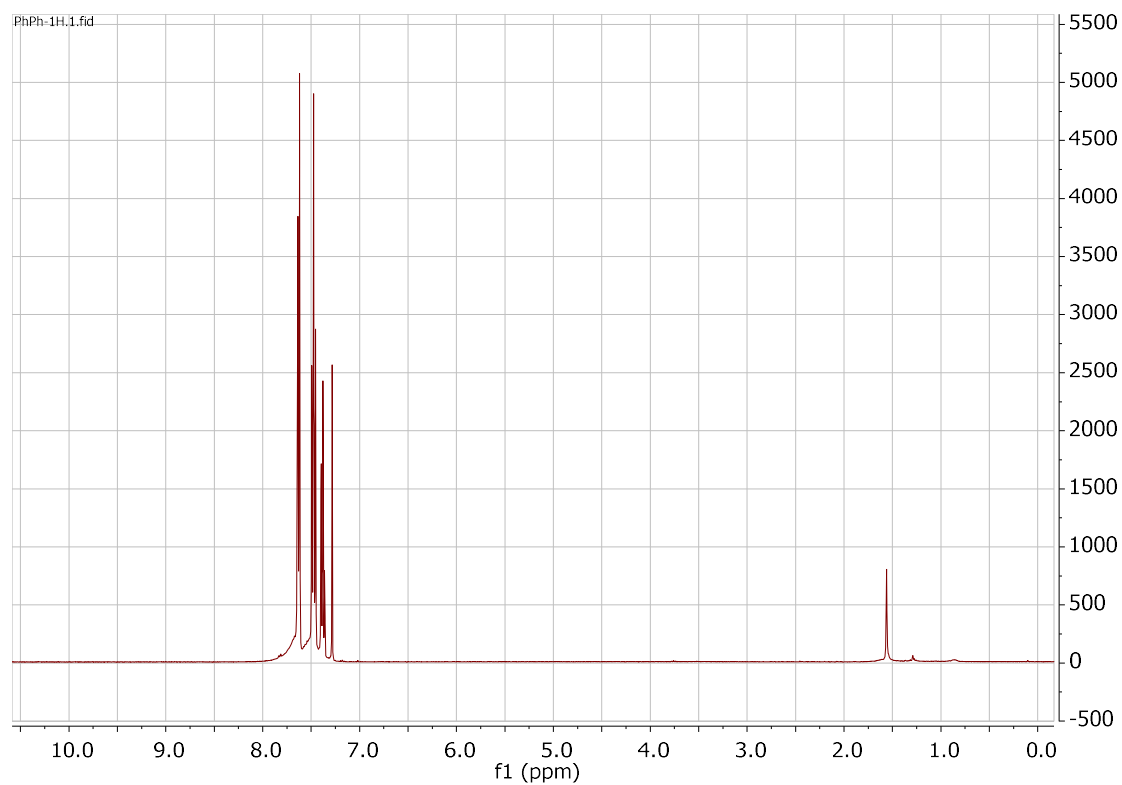

**Figure S2.**  $^1\text{H}$  NMR of biphenyl.  $^1\text{H}$  NMR (400 MHz, 298 K,  $\text{DMSO}-d_6$ )  $\delta$  9.62 (s, 1H), 8.10 (d, 1H), 7.54 (t, 1H), 6.78 (d, 1H).

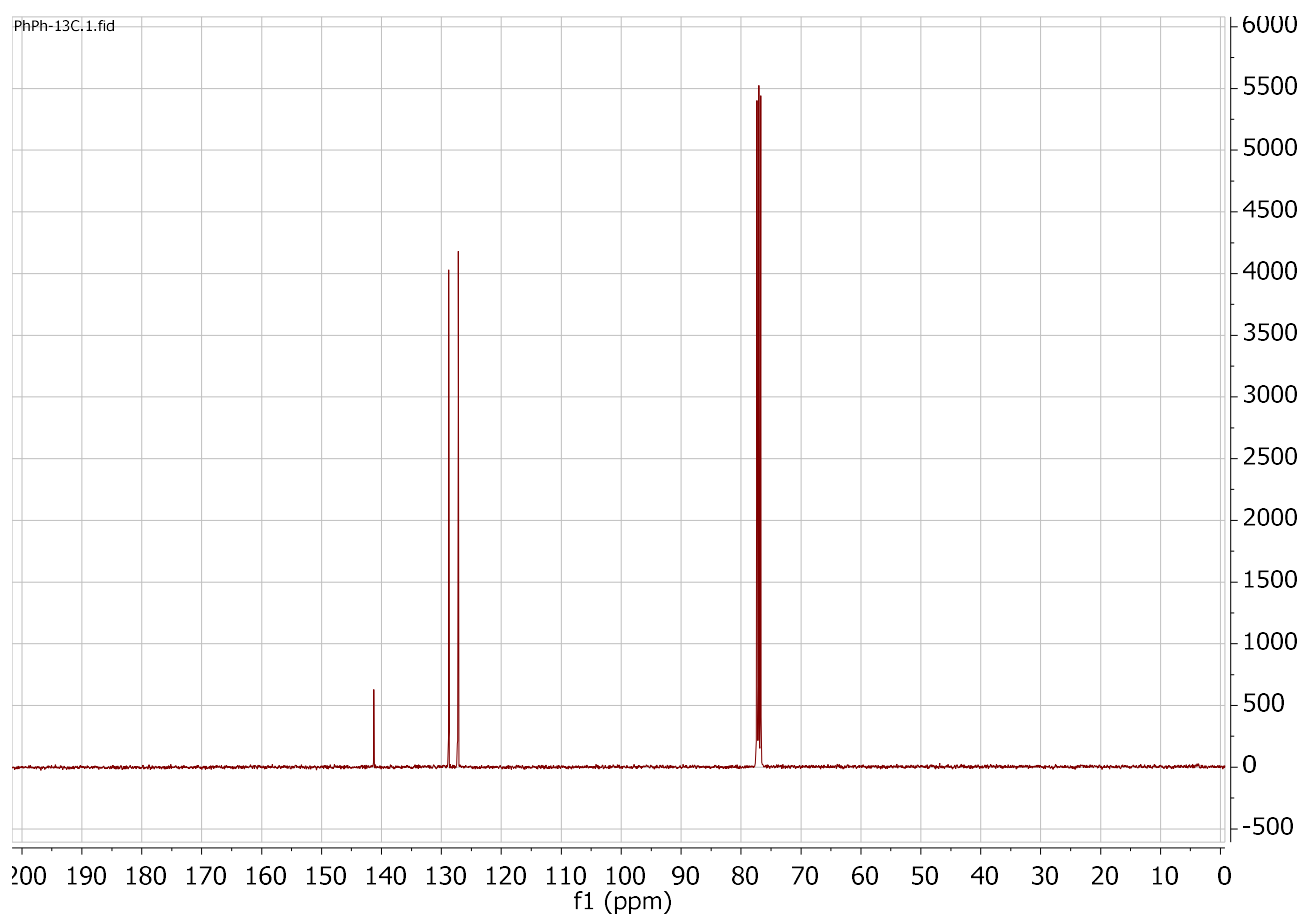

**Figure S3.**  $^{13}\text{C}$  NMR of biphenyl.  $^{13}\text{C}$  NMR (101 MHz, 298 K,  $\text{DMSO-}d_6$ )  $\delta$  178.39, 152.50, 149.17, 122.96, 112.89.

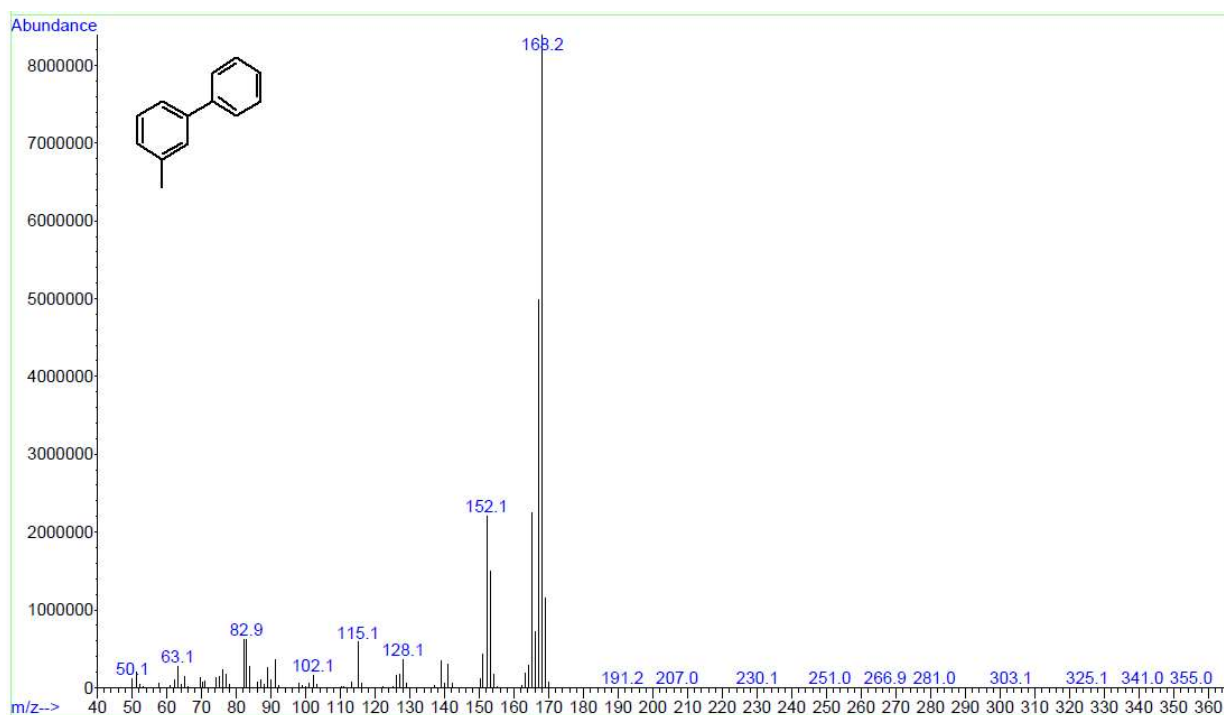

**Figure S4.** MS spectra (EI, 70 eV) of 3-Methyl-1,1'-biphenyl.
