# Supplementary material for: Mechanochemistry through Extrusion: Opportunities for Nanomaterials Design and Catalysis in the Continuous Mode
Source: MDPI journal article supplement (doi:10.3390/chemistry5030120), 2023-08-08
Supplement: s1 [file s1]

Archive with 2 entries (2 files):
- chemistry-2505866-supplementary.mp4
- chemistry-2505866-supplementary.pdf
